# Supplementary material
Source: publisher figshare collection journal article supplement (https://geolsoc.figshare.com/ndownloader/files/24681292)
Supplement: Supplementary file 1 [file 24681292]

## Sheet: Marche Appendix 2
Appendix 2: Modern meteorological data collected at the weather station housed in the Grenfell Campus of Memorial University of Newfoundland. Data collected every 30 minutes, presented as average for 24 hour period.
Date	Average Temperature (°C)
2015-01-01	-9.7
2015-01-02	-5.1
2015-01-03	-12
2015-01-04	-10.6
2015-01-05	-5.5
2015-01-06	-9
2015-01-07	-12.2
2015-01-08	-15
2015-01-09	-7
2015-01-10	-6.7
2015-01-11	-10.9
2015-01-12	-6.7
2015-01-13	-10.2
2015-01-14	-7.8
2015-01-15	-7.6
2015-01-16	-7.8
2015-01-17	-7
2015-01-18	-8.6
2015-01-19	1.8
2015-01-20	-0.3
2015-01-21	-5.5
2015-01-22	-5.6
2015-01-23	-7
2015-01-24	-5
2015-01-25	1.3
2015-01-26	-8.6
2015-01-27	-12.2
2015-01-28	-3.7
2015-01-29	-4.3
2015-01-30	-6.1
2015-01-31	-2.2
2015-02-01	-0.2
2015-02-02	-12.1
2015-02-03	-8.2
2015-02-04	-12.3
2015-02-05	-5.2
2015-02-06	-7.1
2015-02-07	-11.9
2015-02-08	-14
2015-02-09	-16.8
2015-02-10	-15.8
2015-02-11	-12.7
2015-02-12	-15.6
2015-02-13	-11
2015-02-14	-9.7
2015-02-15	-10.7
2015-02-16	-6
2015-02-17	-8.3
2015-02-18	-9.7
2015-02-19	-8.3
2015-02-20	-3
2015-02-21	-8.4
2015-02-22	-3.5
2015-02-23	-5.5
2015-02-24	-11.6
2015-02-25	-9.3
2015-02-26	-5.7
2015-02-27	-10.3
2015-02-28	-11.2
2015-03-01	-7.5
2015-03-02	-6.2
2015-03-03	-9.6
2015-03-04	-9.6
2015-03-05	-7.9
2015-03-06	-14.7
2015-03-07	-9.9
2015-03-08	-7.9
2015-03-09	-11.5
2015-03-10	-10.5
2015-03-11	-3.8
2015-03-12	-11.1
2015-03-13	-15.5
2015-03-14	-12.2
2015-03-15	-8.8
2015-03-16	-8.7
2015-03-17	-3.2
2015-03-18	-1.8
2015-03-19	-2.3
2015-03-20	-5.7
2015-03-21	-3.8
2015-03-22	-1.1
2015-03-23	-9.1
2015-03-24	-5.2
2015-03-25	-6.7
2015-03-26	-2.1
2015-03-27	2.7
2015-03-28	-2
2015-03-29	-3.6
2015-03-30	-1.5
2015-03-31	-1.4
2015-04-01	-1.9
2015-04-02	-5.8
2015-04-03	-2.3
2015-04-04	1.8
2015-04-05	-3.6
2015-04-06	-7.2
2015-04-07	-3.9
2015-04-08	-7.3
2015-04-09	-6.5
2015-04-10	-5.1
2015-04-11	3.7
2015-04-12	-1.3
2015-04-13	0
2015-04-14	6.1
2015-04-15	0.4
2015-04-16	-4.9
2015-04-17	0.4
2015-04-18	-0.3
2015-04-19	-2.2
2015-04-20	-0.7
2015-04-21	2.3
2015-04-22	3.1
2015-04-23	3.5
2015-04-24	4.6
2015-04-25	2.5
2015-04-26	2.9
2015-04-27	4.3
2015-04-28	2.7
2015-04-29	3
2015-04-30	2.1
2015-05-01	2.9
2015-05-02	4.4
2015-05-03	4.5
2015-05-04	6.1
2015-05-05	8.4
2015-05-06	3.9
2015-05-07	1.7
2015-05-08	3.3
2015-05-09	2.9
2015-05-10	5.8
2015-05-11	3.9
2015-05-12	2.8
2015-05-13	1.7
2015-05-14	4.2
2015-05-15	9.7
2015-05-16	11.7
2015-05-17	11.1
2015-05-18	10.5
2015-05-19	11.3
2015-05-20	11.4
2015-05-21	6.8
2015-05-22	8.7
2015-05-23	4.9
2015-05-24	6.9
2015-05-25	11.9
2015-05-26	14.1
2015-05-27	12.6
2015-05-28	14.9
2015-05-29	9.9
2015-05-30	13.9
2015-05-31	12.8
2015-06-01	6
2015-06-02	7.3
2015-06-03	10.9
2015-06-04	11.1
2015-06-05	12.3
2015-06-06	10.4
2015-06-07	8.6
2015-06-08	9.9
2015-06-09	11.3
2015-06-10	16.5
2015-06-11	16.7
2015-06-12	15
2015-06-13	11.1
2015-06-14	6.6
2015-06-15	8.6
2015-06-16	12
2015-06-17	10.6
2015-06-18	15.1
2015-06-19	13.5
2015-06-20	11.7
2015-06-21	13.5
2015-06-22	14.7
2015-06-23	14.6
2015-06-24	10.8
2015-06-25	8.6
2015-06-26	8.9
2015-06-27	11.1
2015-06-28	15.6
2015-06-29	13.3
2015-06-30	13.6
2015-07-01	16.7
2015-07-02	18.2
2015-07-03	18.5
2015-07-04	15.1
2015-07-05	15.1
2015-07-06	13
2015-07-07	14.8
2015-07-08	17.5
2015-07-09	15.8
2015-07-10	16.2
2015-07-11	13.2
2015-07-12	12.8
2015-07-13	15.3
2015-07-14	16.6
2015-07-15	19.2
2015-07-16	15.8
2015-07-17	14.3
2015-07-18	12.3
2015-07-19	10.9
2015-07-20	11.6
2015-07-21	12.1
2015-07-22	13.9
2015-07-23	11.1
2015-07-24	11.3
2015-07-25	11.7
2015-07-26	11.7
2015-07-27	13.9
2015-07-28	18
2015-07-29	16.7
2015-07-30	15.1
2015-07-31	17.3
2015-08-01	18.7
2015-08-02	19.1
2015-08-03	20.4
2015-08-04	21.2
2015-08-05	21.3
2015-08-06	17.5
2015-08-07	14.1
2015-08-08	15
2015-08-09	16.6
2015-08-10	12
2015-08-11	18.2
2015-08-12	16.3
2015-08-13	18.8
2015-08-14	20.9
2015-08-15	19.6
2015-08-16	20.4
2015-08-17	21.5
2015-08-18	22.4
2015-08-19	18.2
2015-08-20	20.2
2015-08-21	22
2015-08-22	22.5
2015-08-23	21.3
2015-08-24	19.6
2015-08-25	18.3
2015-08-26	18.3
2015-08-27	17.3
2015-08-28	17.3
2015-08-29	18.1
2015-08-30	17.1
2015-08-31	19.2
2015-09-01	13.9
2015-09-02	11.4
2015-09-03	15.2
2015-09-04	11.5
2015-09-05	13.3
2015-09-06	11.8
2015-09-07	15.2
2015-09-08	10.5
2015-09-09	11.9
2015-09-10	17.9
2015-09-11	15.2
2015-09-12	13.3
2015-09-13	13.5
2015-09-14	12.9
2015-09-15	14.9
2015-09-16	13
2015-09-17	13.6
2015-09-18	12.8
2015-09-19	17.6
2015-09-20	19.6
2015-09-21	12.4
2015-09-22	11.5
2015-09-23	13.8
2015-09-24	12.6
2015-09-25	8.2
2015-09-26	5.4
2015-09-27	9.5
2015-09-28	16
2015-09-29	17.2
2015-09-30	16.9
2015-10-01	13.4
2015-10-02	6.5
2015-10-03	5.3
2015-10-04	6.3
2015-10-05	9
2015-10-06	11
2015-10-07	9.2
2015-10-08	9.6
2015-10-09	6.9
2015-10-10	6.6
2015-10-11	3.6
2015-10-12	7.7
2015-10-13	13.1
2015-10-14	17
2015-10-15	10
2015-10-16	7.8
2015-10-17	6.7
2015-10-18	3.8
2015-10-19	2.7
2015-10-20	3.6
2015-10-21	4.5
2015-10-22	4.7
2015-10-23	6.8
2015-10-24	1.4
2015-10-25	5.7
2015-10-26	6
2015-10-27	1.4
2015-10-28	0.9
2015-10-29	3.4
2015-10-30	9.2
2015-10-31	2.9
2015-11-01	3.8
2015-11-02	3
2015-11-03	0.6
2015-11-04	1.4
2015-11-05	-0.2
2015-11-06	1.5
2015-11-07	7.5
2015-11-08	1.6
2015-11-09	0.3
2015-11-10	3.2
2015-11-11	-1.5
2015-11-12	-1.4
2015-11-13	0.9
2015-11-14	3.2
2015-11-15	1.4
2015-11-16	0.4
2015-11-17	-0.4
2015-11-18	-1.1
2015-11-19	-1.9
2015-11-20	-2.4
2015-11-21	0.1
2015-11-22	5.8
2015-11-23	13.8
2015-11-24	4
2015-11-25	-2.7
2015-11-26	-0.1
2015-11-27	7.3
2015-11-28	0.3
2015-11-29	-4.3
2015-11-30	-8.1
2015-12-01	-2.6
2015-12-02	2.3
2015-12-03	0.1
2015-12-04	-6.6
2015-12-05	-3
2015-12-06	0.4
2015-12-07	2.9
2015-12-08	1.2
2015-12-09	-0.7
2015-12-10	-0.7
2015-12-11	3.9
2015-12-12	7
2015-12-13	1.4
2015-12-14	-2.6
2015-12-15	-2.4
2015-12-16	-2.8
2015-12-17	-4.2
2015-12-18	-1.1
2015-12-19	0.6
2015-12-20	-2.6
2015-12-21	-3.9
2015-12-22	-8.9
2015-12-23	-6.9
2015-12-24	-2.4
2015-12-25	4.8
2015-12-26	-1.1
2015-12-27	-6.1
2015-12-28	-9.3
2015-12-29	-10.4
2015-12-30	-10.7
2015-12-31	-4.3
